# Supplementary material for: Intrinsic catalytic activity of Brønsted acid ionic liquids for the synthesis of triphenylmethane and phthalein under microwave irradiation
Source: Royal Society of Chemistry journal article supplement (doi:10.1039/c2ra21803h), 2012-01-01

## Supporting Information

### Intrinsic catalytic activity of Bronsted Acid Ionic Liquids for Synthesis of Triphenyl Methane and Phthalein under Microwave

Amol S. Choudhari<sup>a</sup>, Yogesh Parab<sup>b</sup>, Vikas Patil<sup>a</sup>, N. Sekar<sup>a\*</sup> S. R. Shukla<sup>b\*</sup>

<sup>a</sup>*Tinctorial Chemistry Group, Department of dyestuff and intermediate Technology,*

<sup>b</sup>*Department of Textile and Fibre Processing Technology*

*Institute of Chemical Technology, Matunga, Mumbai-400019, Maharashtra (India).*

1. General Information
2. Typical Procedure
3. Spectral Data
4. <sup>1</sup>H NMR, <sup>13</sup>C NMR Spectra and Mass Spectra

#### 1. General Information

All chemicals were commercially available and used without further purification. <sup>1</sup>H NMR and <sup>13</sup>C NMR spectra were obtained on a Varian Mercury plus 300 MHz NMR Spectrometer Chemical shift values are expressed in  $\delta$  units relative to tetramethylsilane (TMS) signal as internal reference CDCl<sub>3</sub>. Data are reported as follows: chemical shift in ppm ( $\delta$ ), multiplicity (s = singlet, d = doublet, t = triplet, br = broad singlet, m = multiplet), coupling constant  $J$  (Hz).

## Spectral data

### $^1\text{H}$ NMR & $^{13}\text{C}$ NMR Spectra

#### 4,4'-(phenylmethylene)bis(N,Ndimethylethaniline) 3a

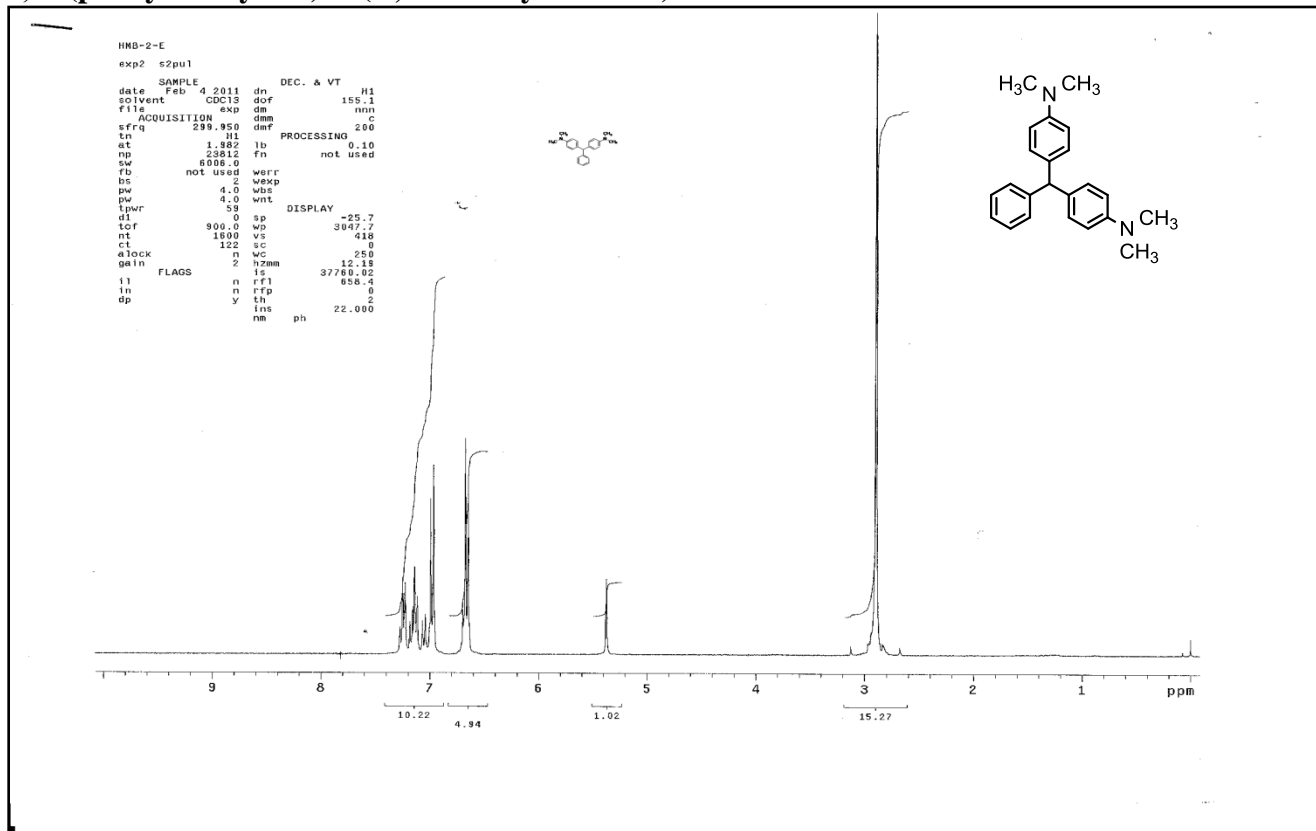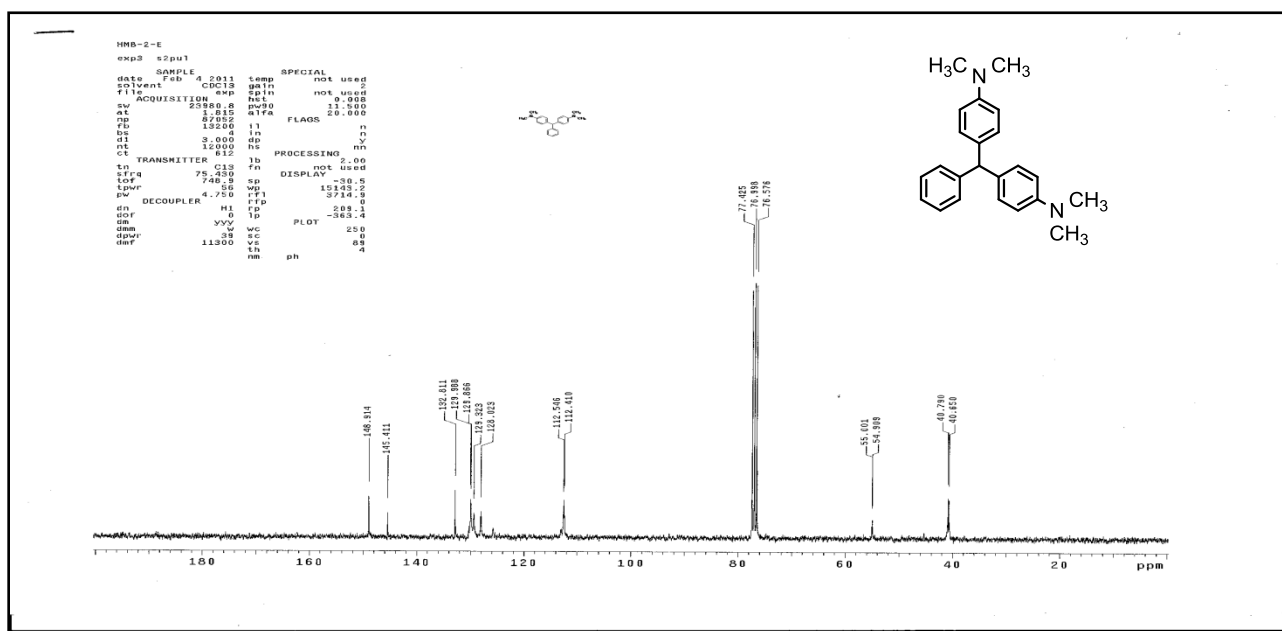

# $^1\text{H}$ NMR & $^{13}\text{C}$ NMR Spectra

## 4,4'-(cyclohexylphenylmethylene)bis(N,Ndimethylaniline) 3c

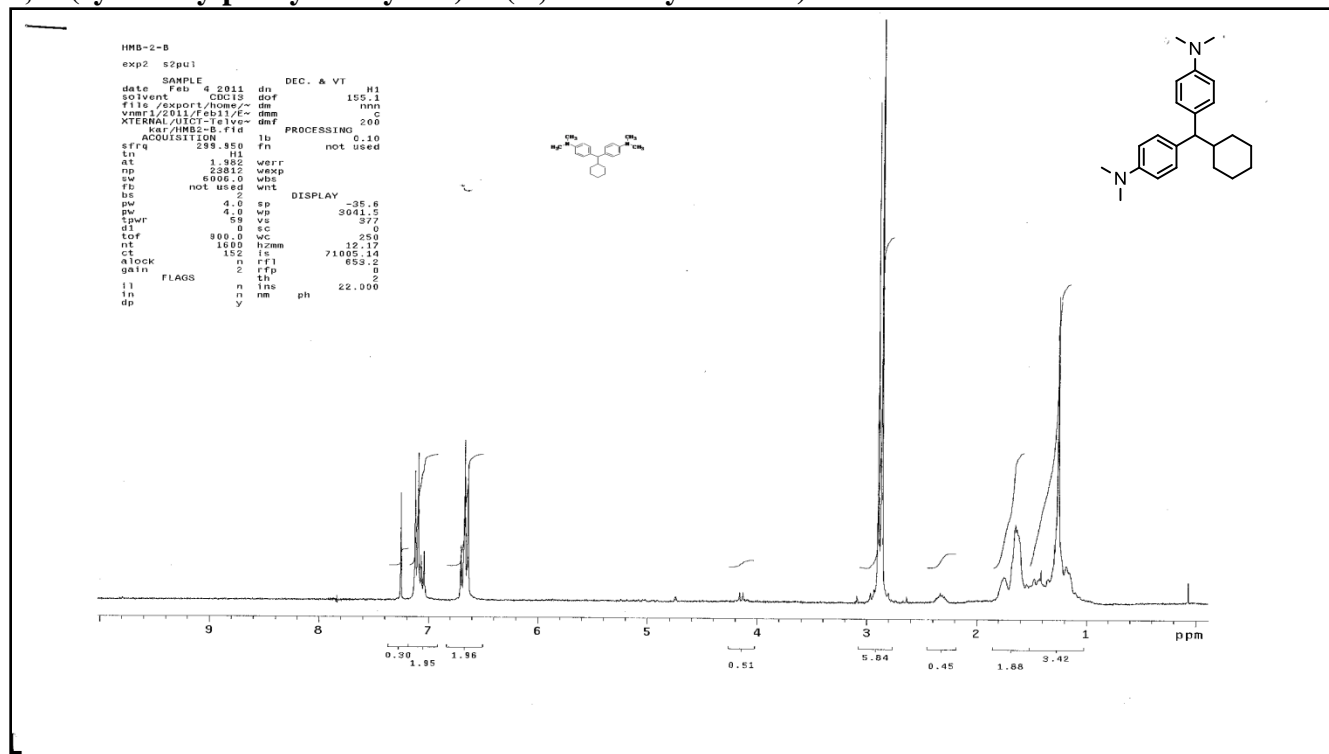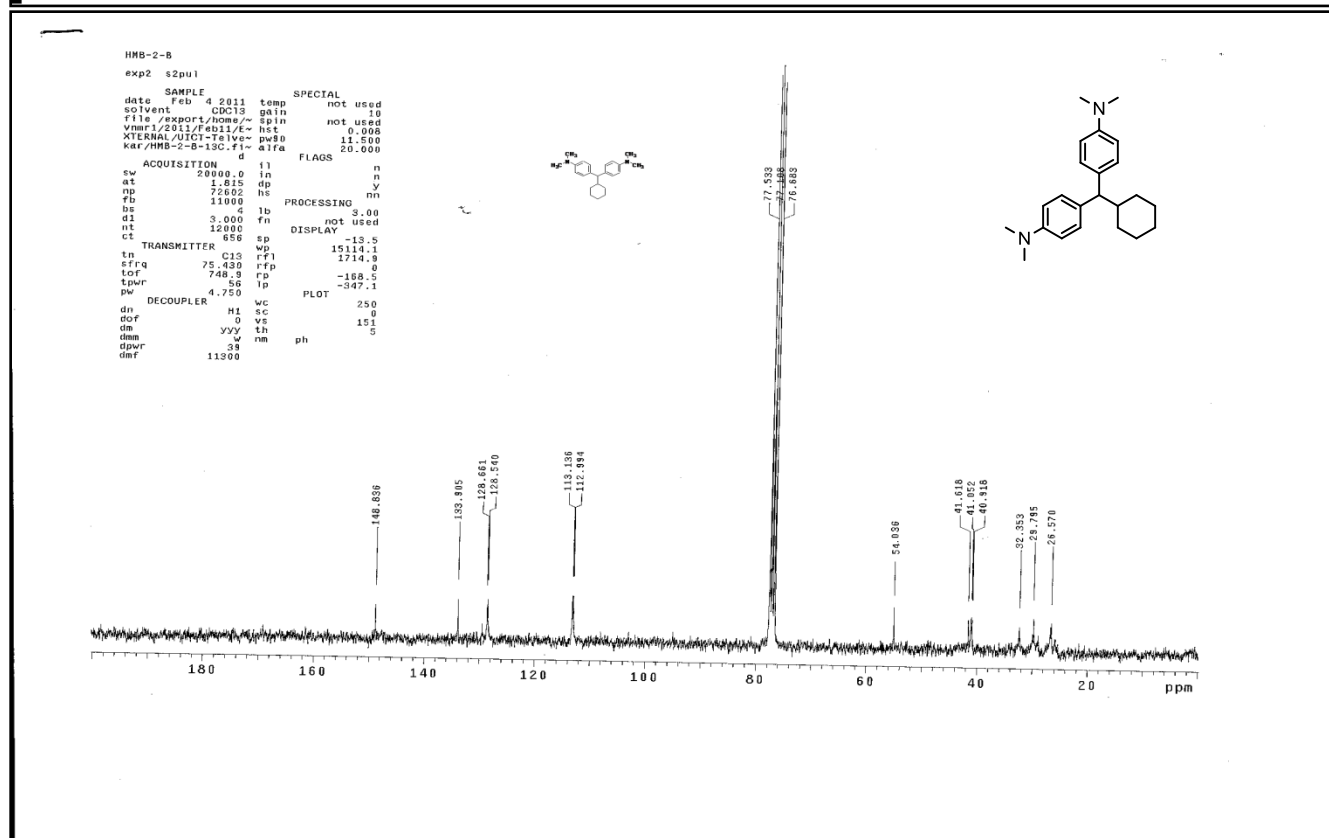

# $^1\text{H}$ NMR & $^{13}\text{C}$ NMR Spectra

## 4,4'-(3-methylbutane-1,1-diyl)bis(N,N-dimethylethaniline)

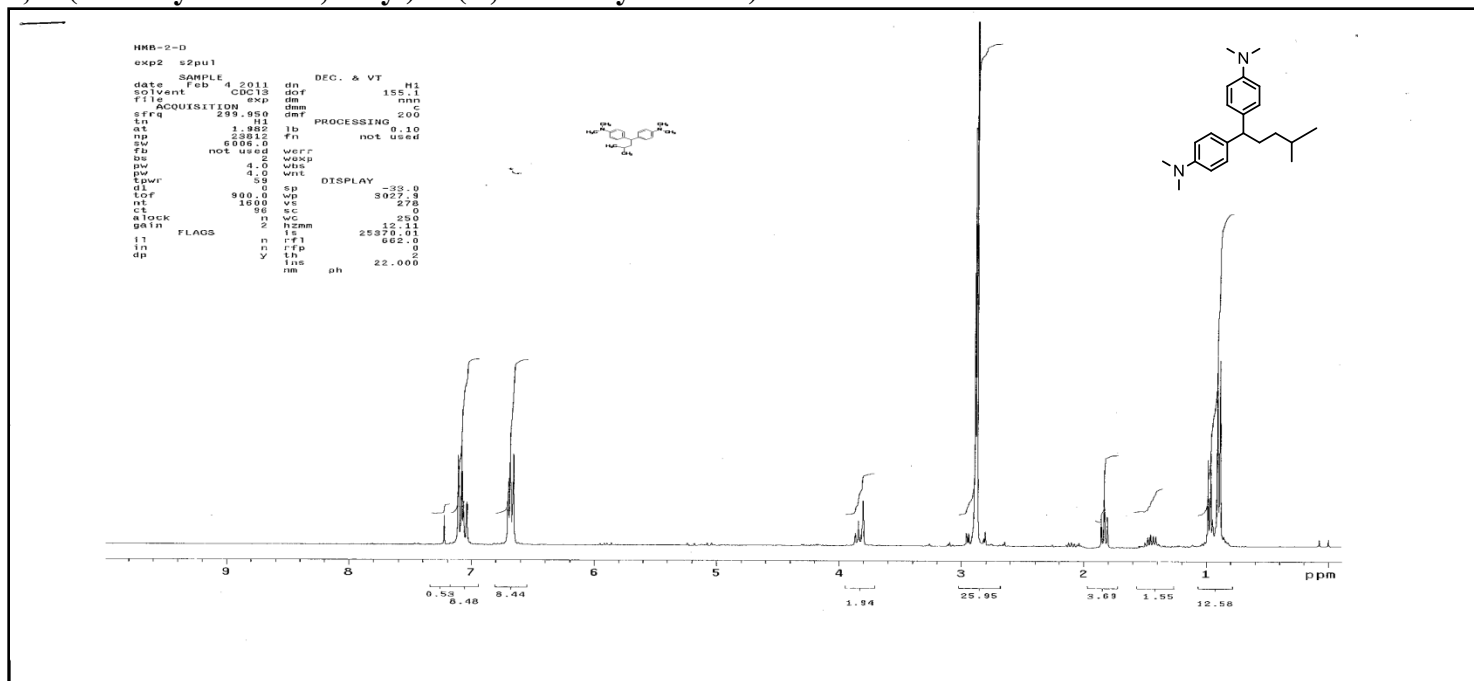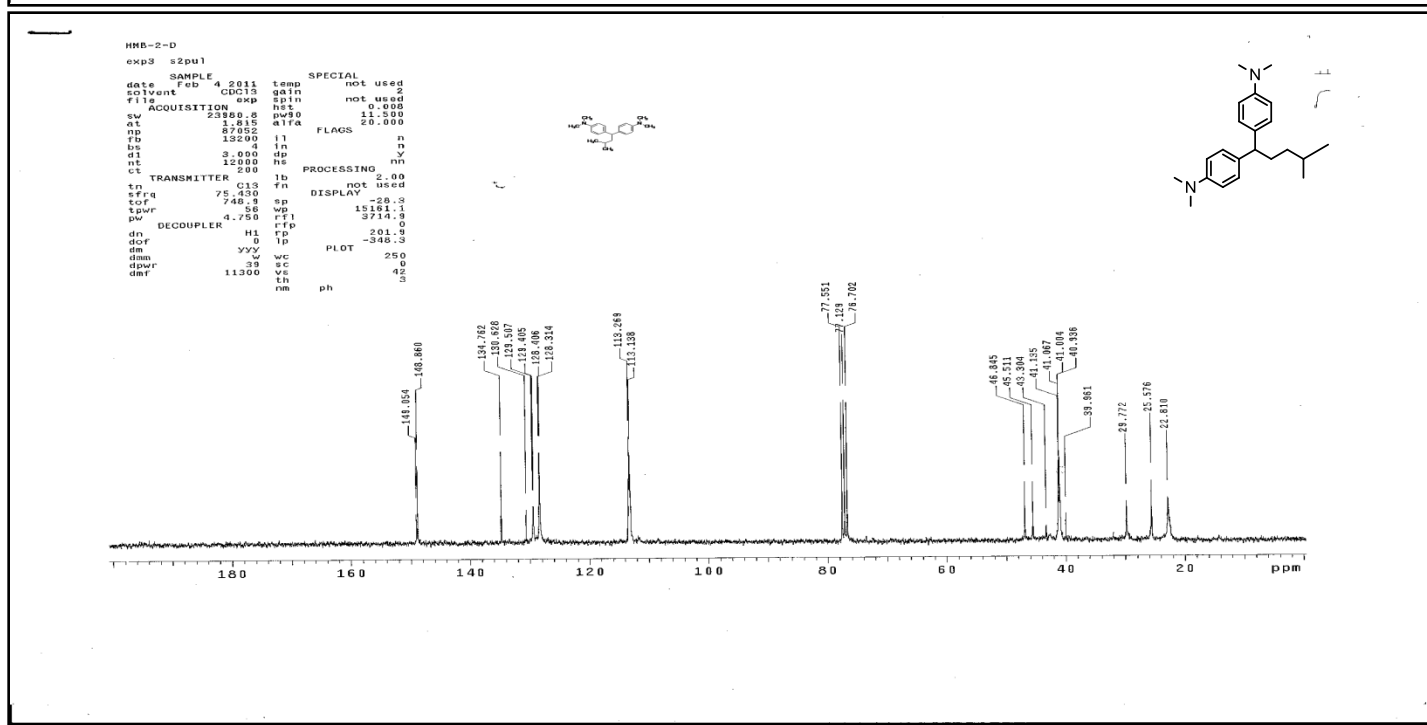

### 4,4'-(propane-1,1-diyl)bis(N,N-dimethylaniline) 3e

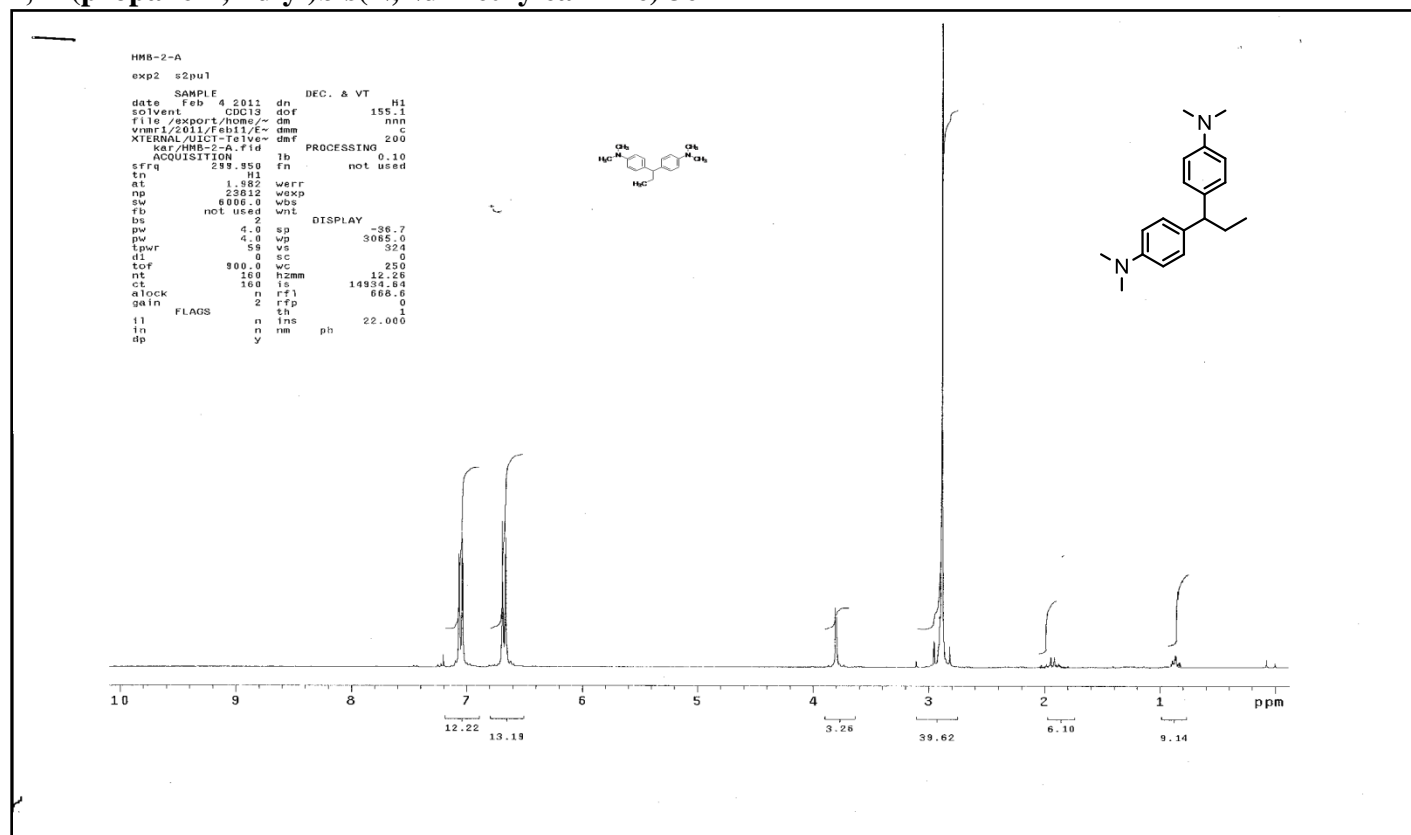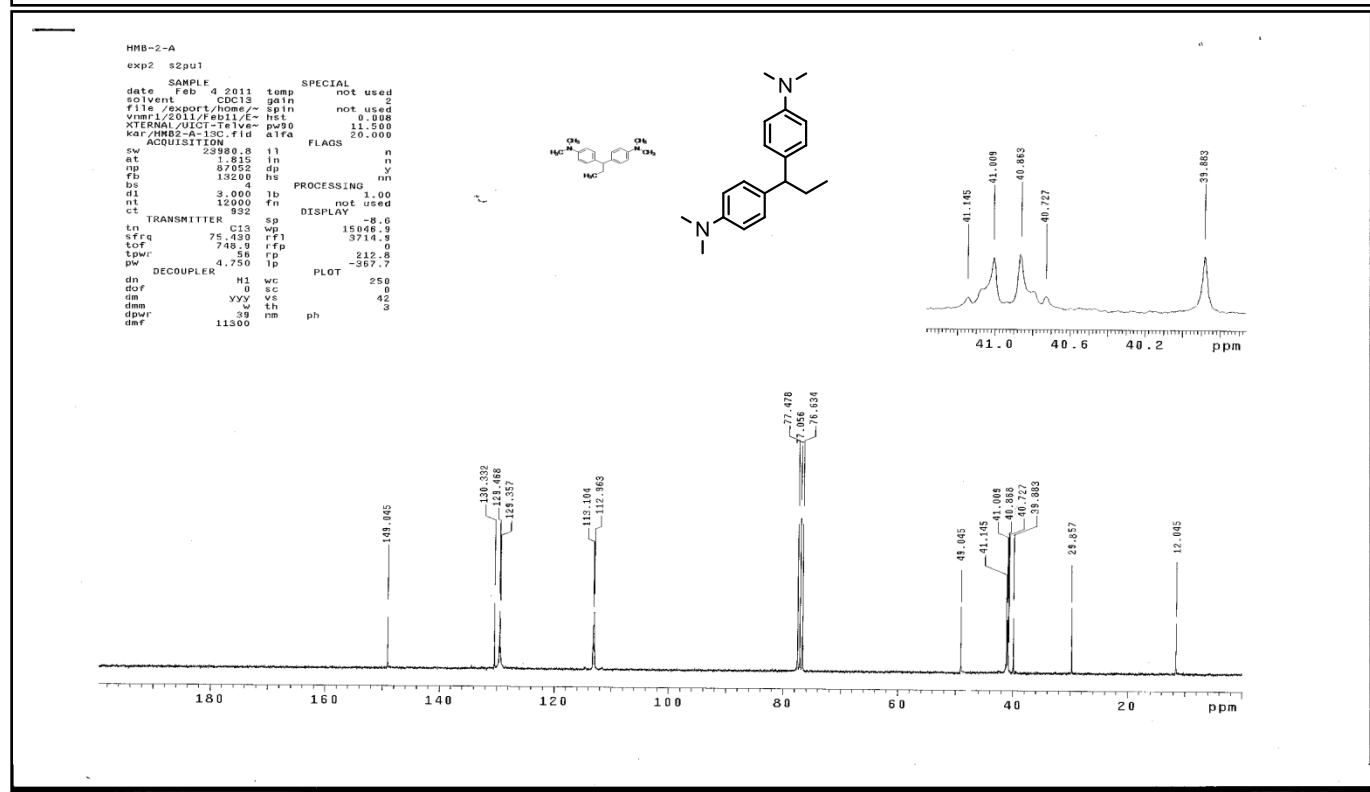

**(E)-4,4'-(3-phenylprop-2-ene-1,1-diyl)bis(N,Ndimethyleaniline)3f**

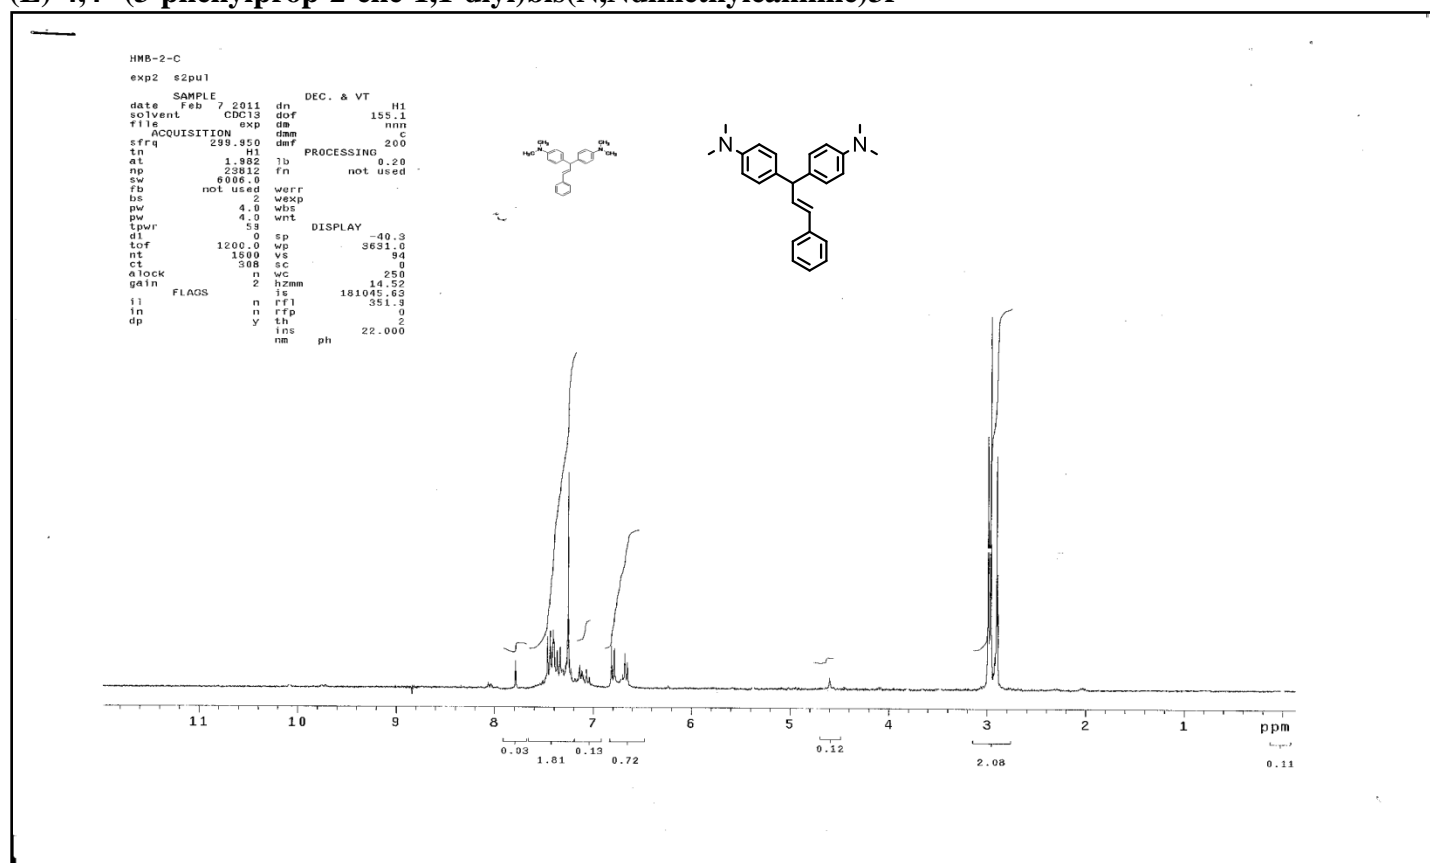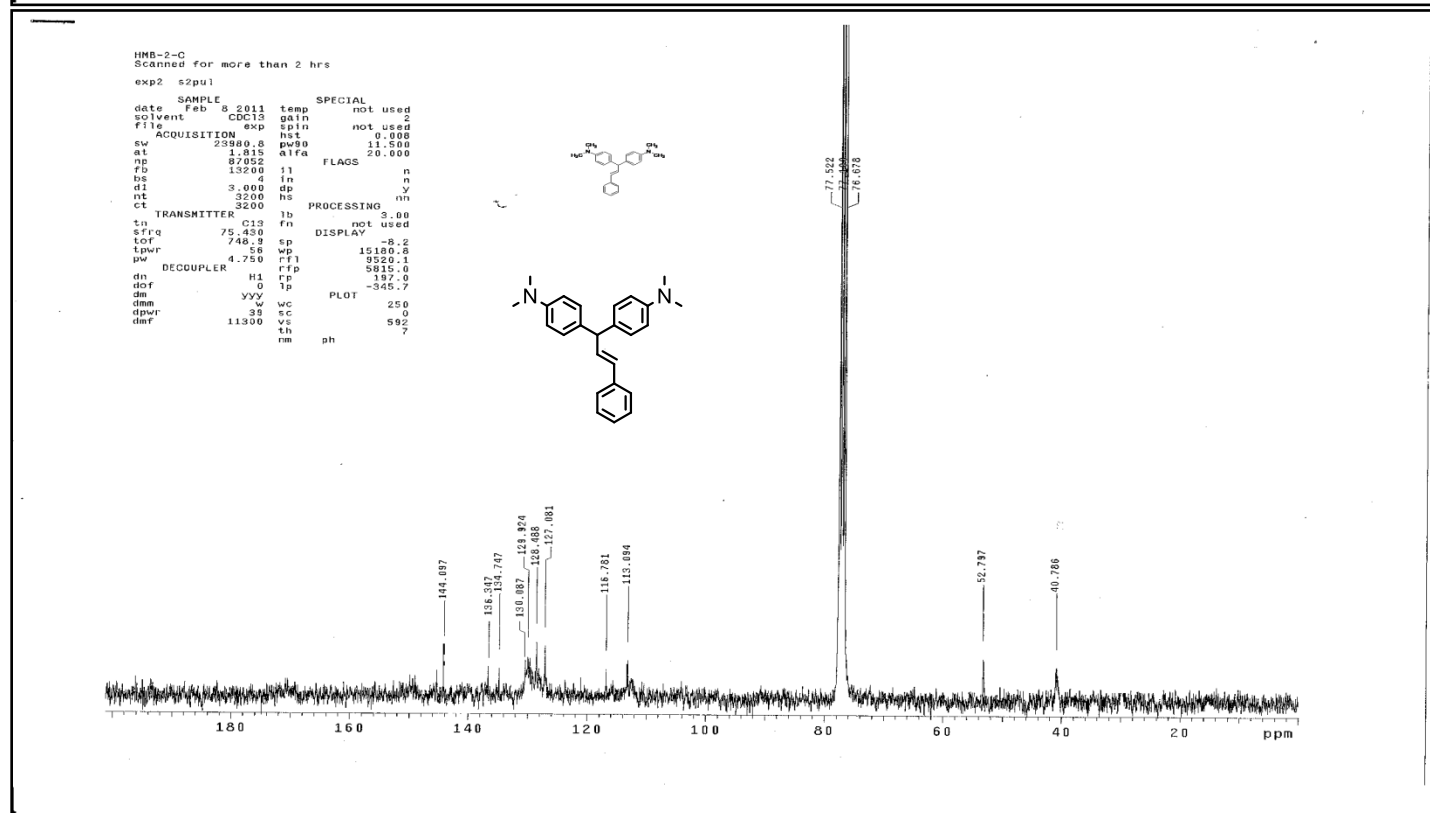

## $^1\text{H}$ - NMR Spectrum

2',7'-bis(1H-benzo[d]imidazol-2-yl)-3',6'-dihydroxy-4a',9a'-dihydro-3H-spiro[isobenzofuran-1,9'-xanthen]-3-one **6f**

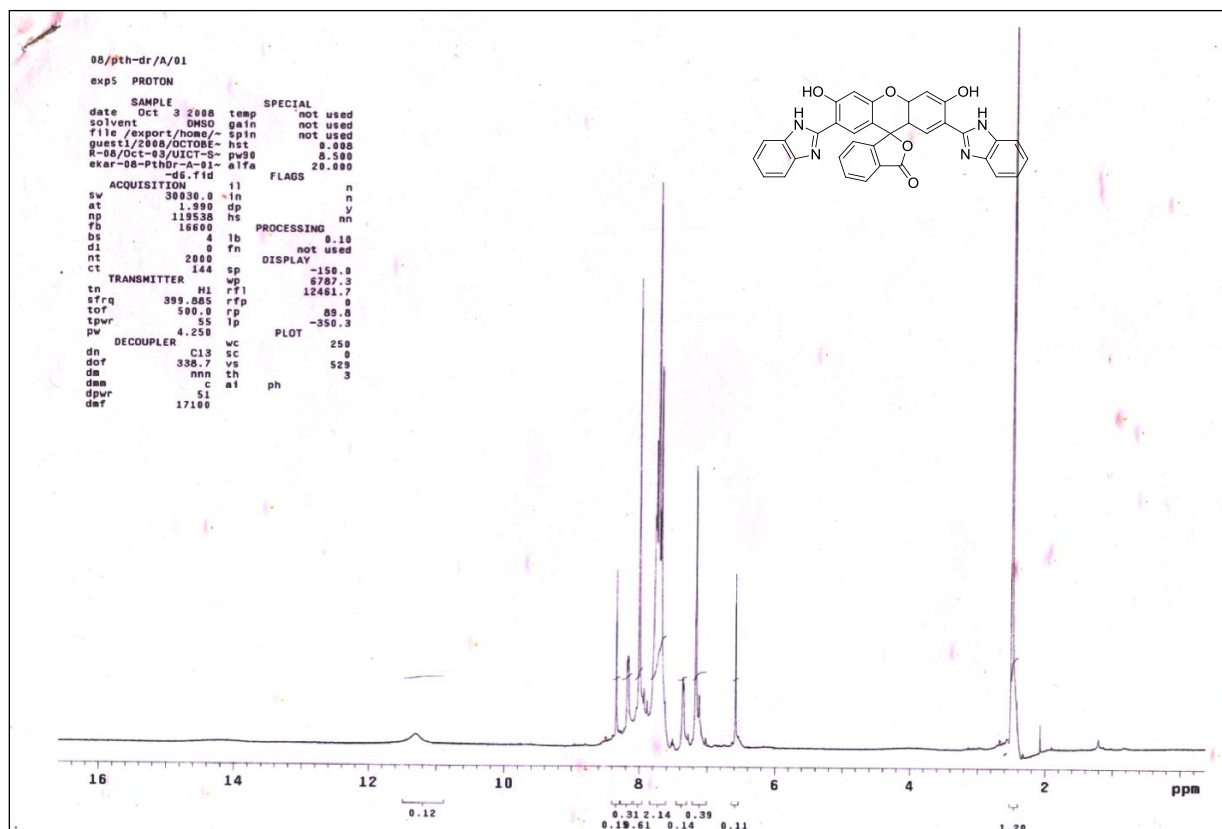

## $C^{13}$ - NMR Spectrum

2',7'-bis(1H-benzo[d]imidazol-2-yl)-3',6'-dihydroxy-4a',9a'-dihydro-3H-spiro[isobenzofuran-1,9'-xanthen]-3-one **6f**

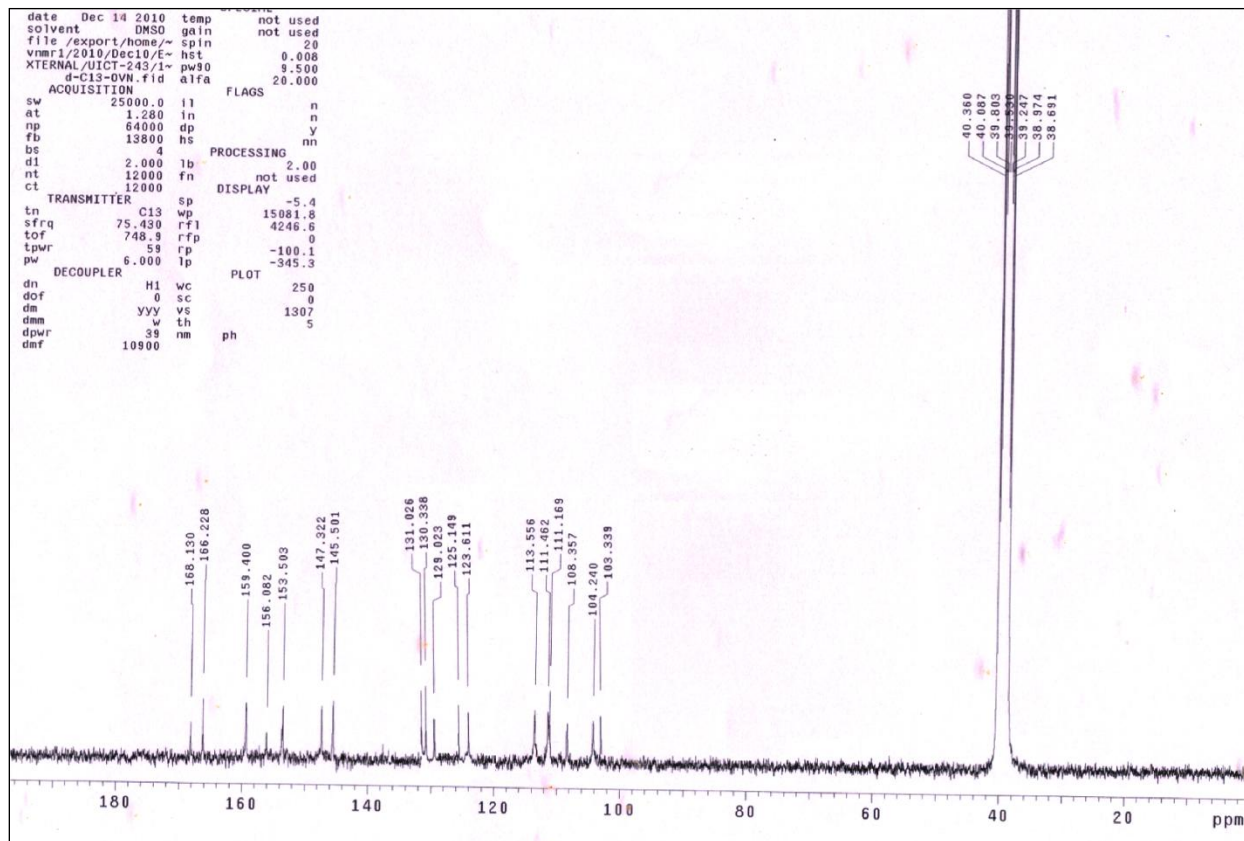



## $^1\text{H}$ - NMR Spectrum

5-amino-2',7'-bis(1H-benzo[d]imidazol-2-yl)-3',6'-dihydroxy-4a',9a'-dihydro-3H-spiro[isobenzofuran-1,9'-xanthen]-3-one **6g**

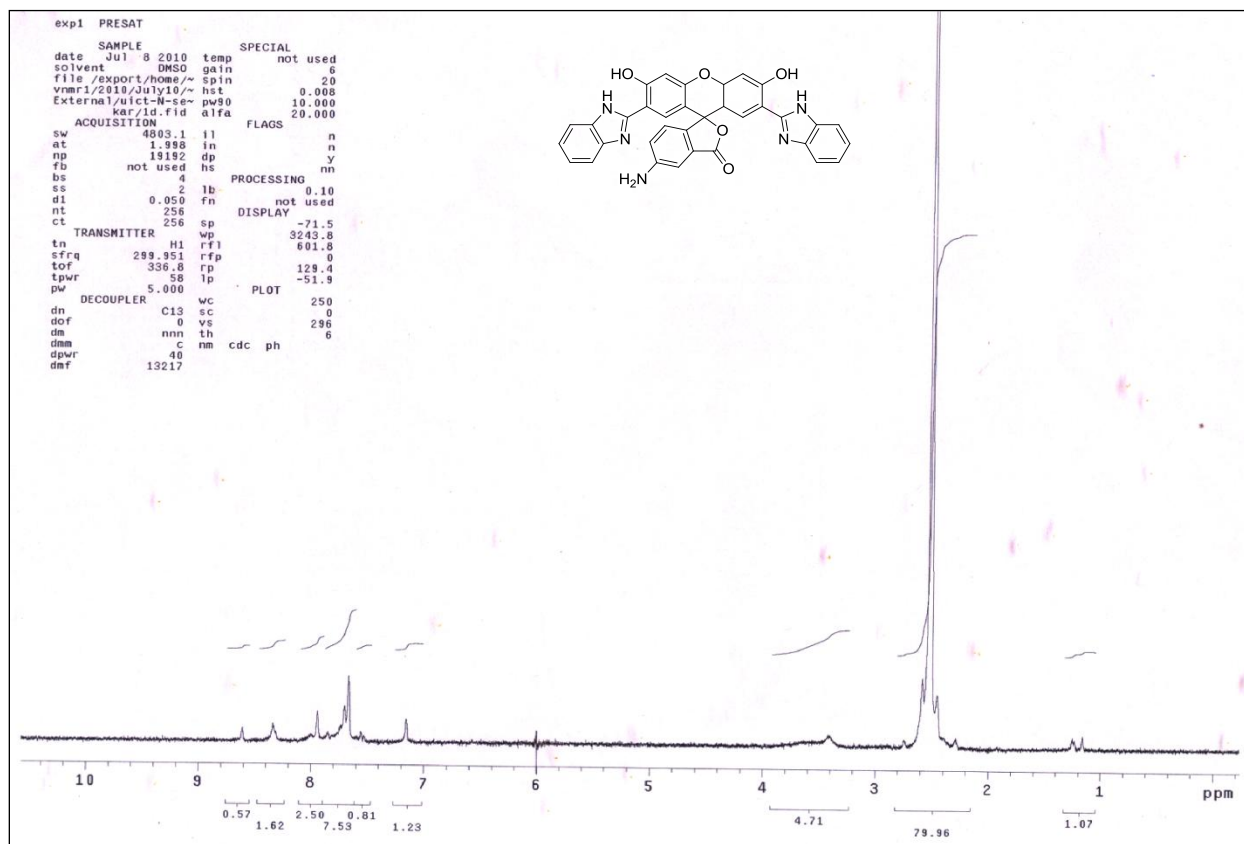

## C<sup>13</sup>- NMR Spectrum

5-amino-2',7'-bis(1H-benzo[d]imidazol-2-yl)-3',6'-dihydroxy-4a',9a'-dihydro-3H-spiro[isobenzofuran-1,9'-xanthen]-3-one **6g**

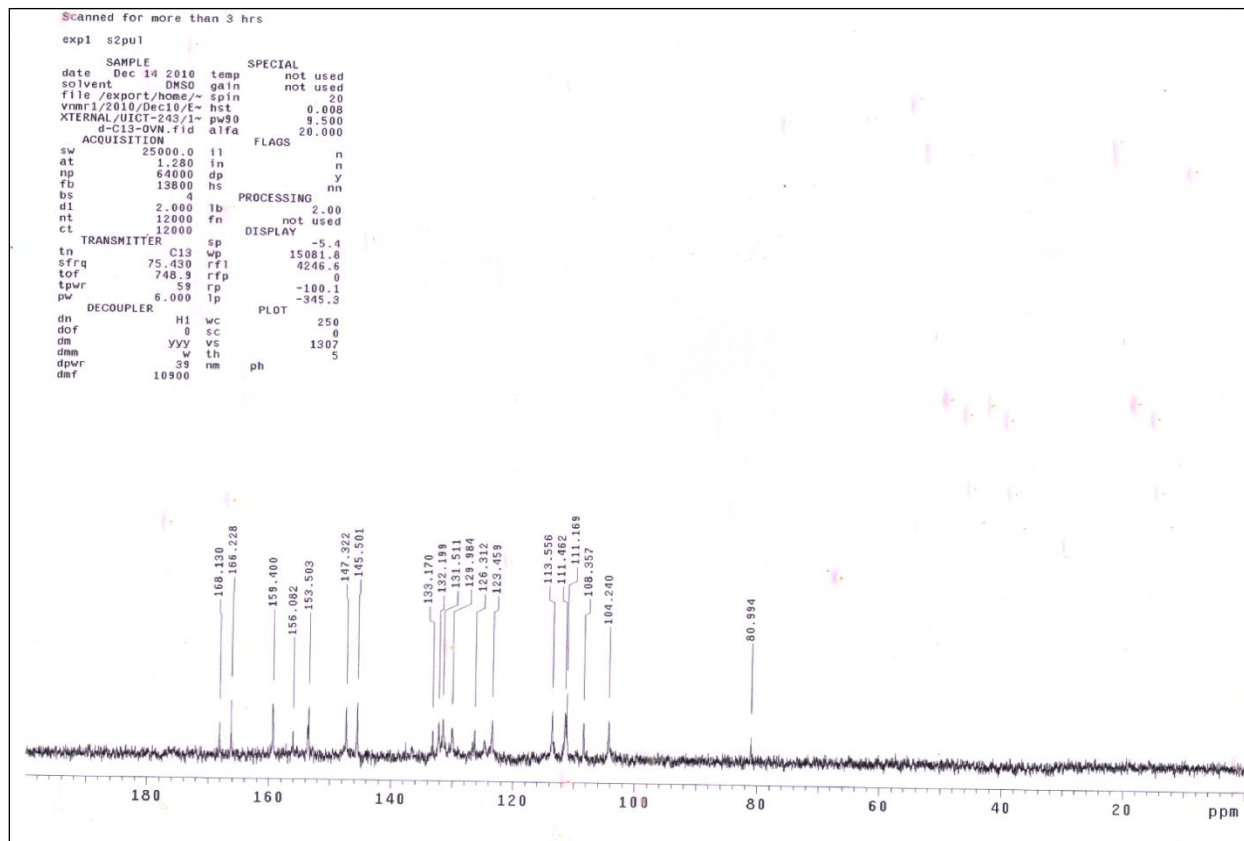

## C<sup>13</sup>- NMR Spectrum

2',7'-bis(1H-benzo[d]imidazol-2-yl)-3',6'-dihydroxy-3-oxo-4a',9a'-dihydro-3H-spiro[isobenzofuran-1,9'-xanthene]-5-carboxylic acid **6h**

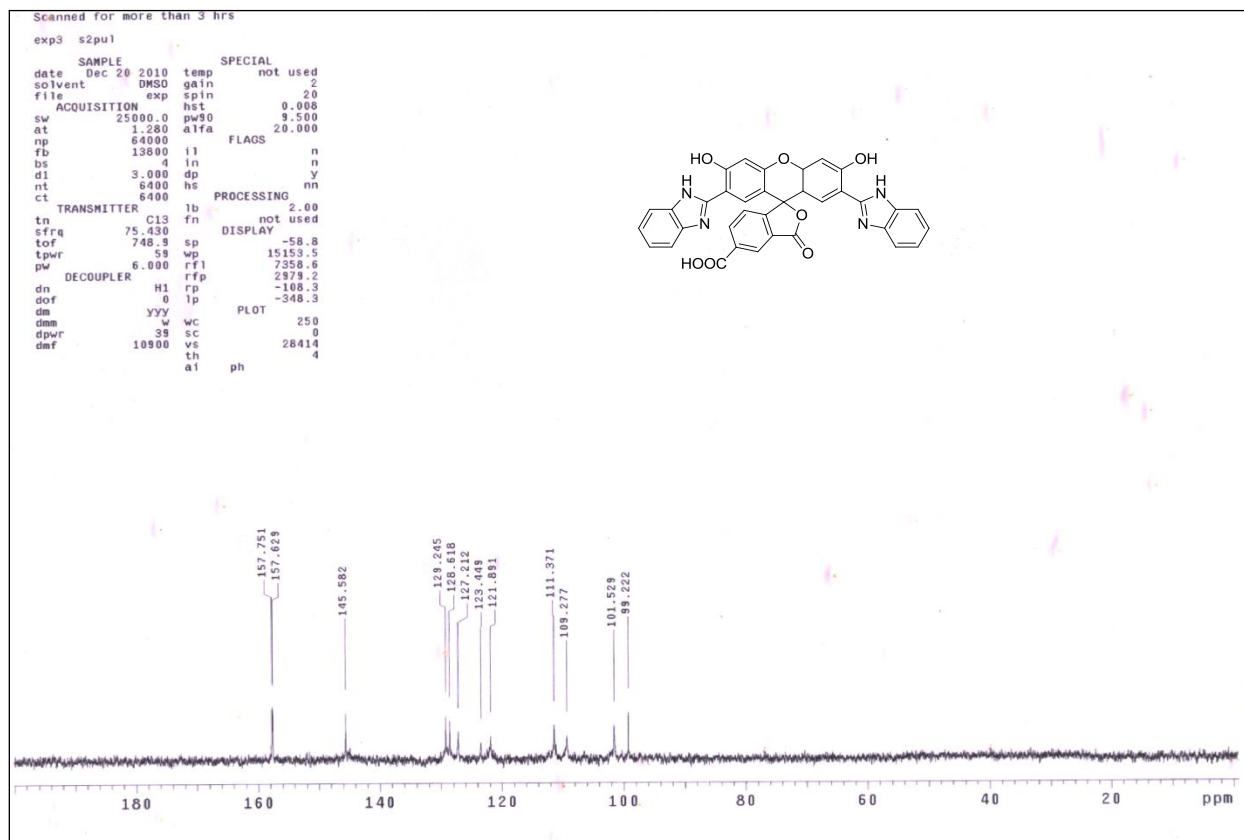

## Mass spectrum 6f

2',7'-bis(1H-benzo[d]imidazol-2-yl)-3',6'-dihydroxy-4a',9a'-dihydro-3H-spiro[isobenzofuran-1,9'-xanthen]-3-one **6f**

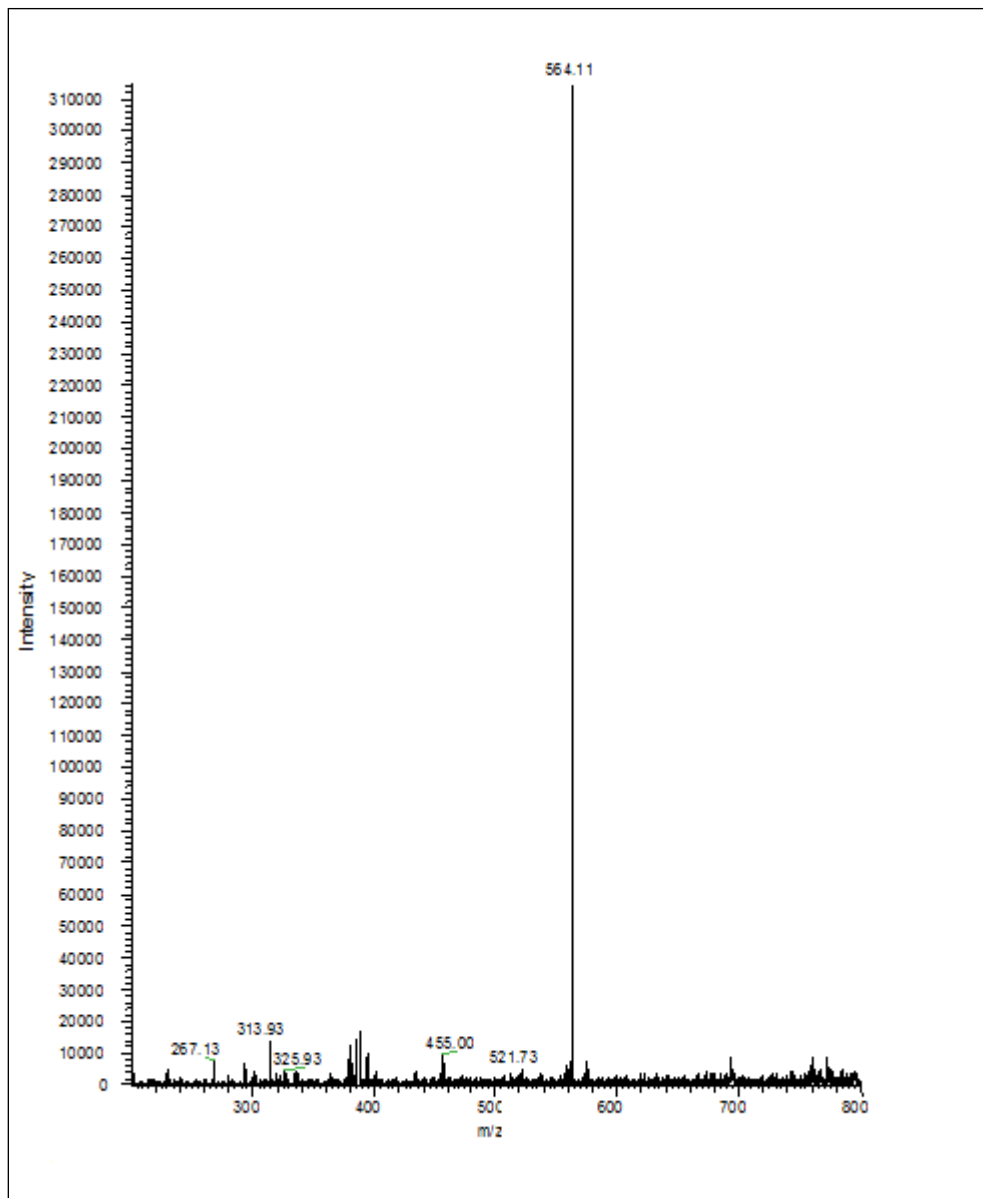

## Mass spectrum 6g

5-amino-2',7'-bis(1H-benzo[d]imidazol-2-yl)-3',6'-dihydroxy-4a',9a'-dihydro-3H-spiro[isobenzofuran-1,9'-xanthen]-3-one **6g**

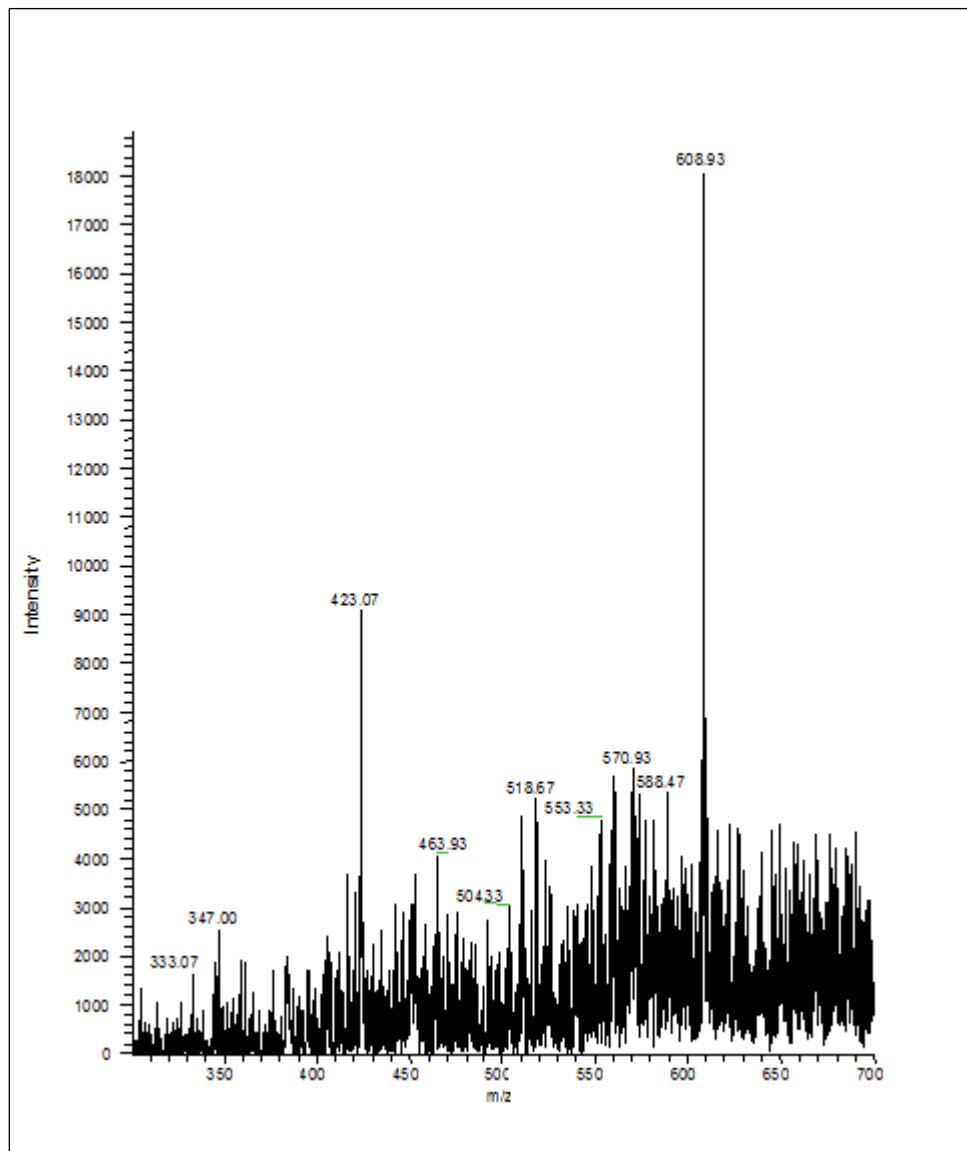

## Mass spectrum 6h

2',7'-bis(1H-benzo[d]imidazol-2-yl)-3',6'-dihydroxy-3-oxo-4a',9a'-dihydro-3H-spiro[isobenzofuran-1,9'-xanthene]-5-carboxylic acid **6h**

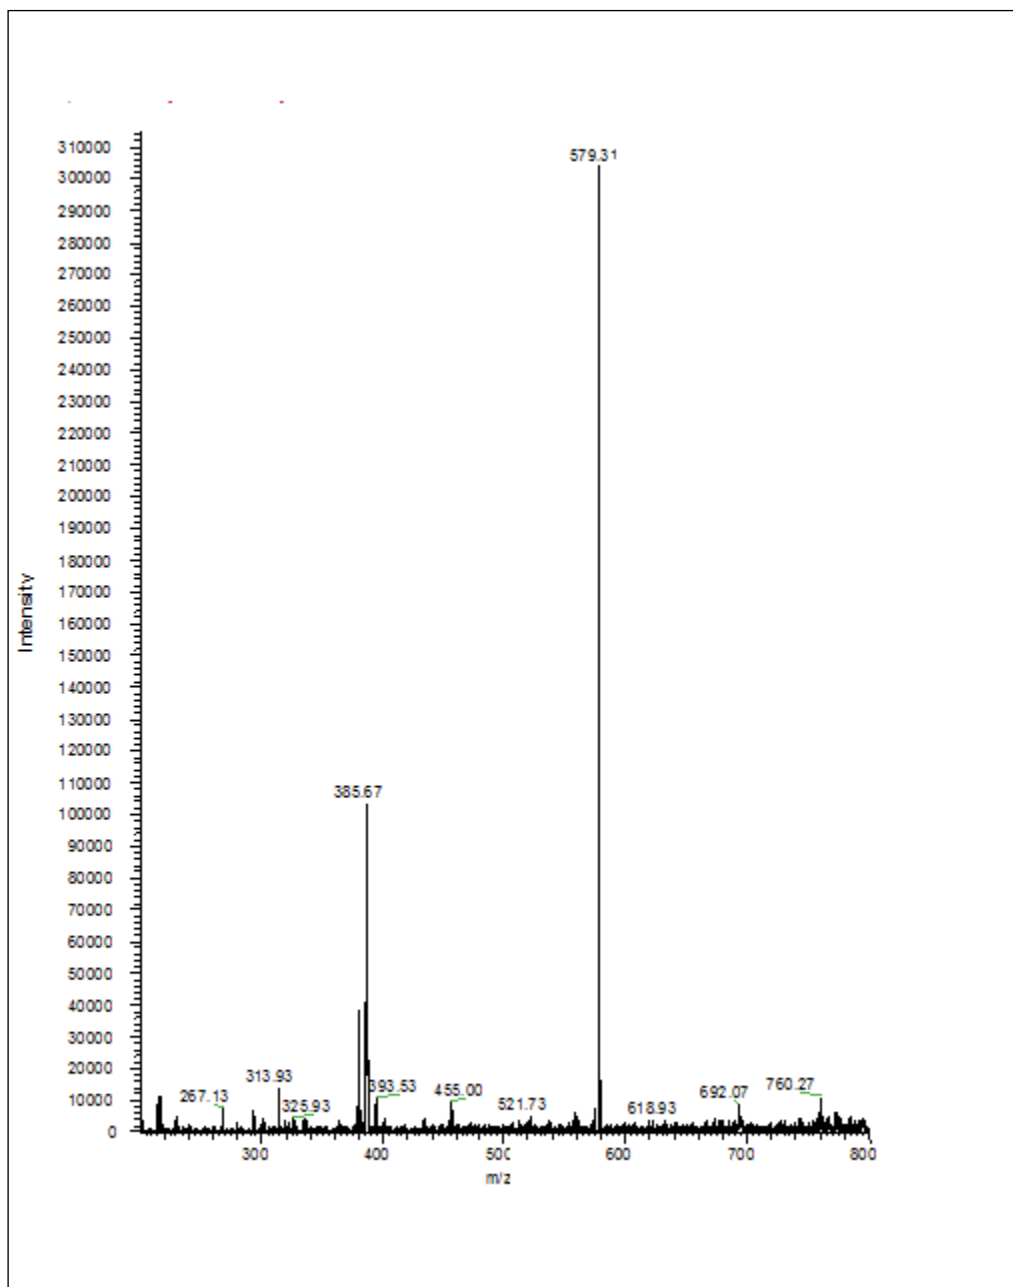

Supplement: c2ra21803h.pdf [file c2ra21803h.pdf]
